# Supplementary material for: Specific polyunsaturated fatty acids modulate lipid delivery and oocyte development in C. elegans revealed by molecular-selective label-free imaging
Source: PubMed Central journal article supplement (PMC4989181; doi:10.1038/srep32021), 2016-08-18
Supplement: srep32021-s1.pdf [file srep32021-s1.pdf]

**Specific polyunsaturated fatty acids modulate lipid delivery and oocyte development in *C. elegans* revealed by molecular-selective label-free imaging**

Wei-Wen Chen<sup>1,2,3,+</sup>, Yung-Hsiang Yi<sup>4,5,+</sup>, Cheng-Hao Chien<sup>1</sup>, Kuei-Ching Hsiung<sup>5</sup>, Tian-Hsiang Ma<sup>5</sup>, Yi-Chun Lin<sup>1</sup>, Szecheng J. Lo<sup>4,5,\*</sup>, and Ta-Chau Chang<sup>1,2,\*</sup>

<sup>1</sup>Institute of Atomic and Molecular Sciences, Academia Sinica, Taipei 106, Taiwan

<sup>2</sup>Molecular Science and Technology Program, Taiwan International Graduate Program, Academia Sinica, Taipei 106, Taiwan

<sup>3</sup>Department of Chemistry, National Tsing Hua University, Hsinchu 300, Taiwan

<sup>4</sup>Center of Molecular Medicine and <sup>5</sup>Department of Biomedical Sciences, College of Medicine, Chang Gung University, Kwei-Shan, Tao-Yuan 333, Taiwan

+these authors contributed equally to this work

\* corresponding author

Prof. Szecheng J. Lo

email: losj@mail.cgu.edu.tw

Tel: 886-3-211-8800 ext.3405

Fax: 886-3-211-8700

Prof. Ta-Chau Chang

email: tcchang@po.iam.s.sinica.edu.tw

Tel: 886-2-2366-8231

Fax: 886-2-23620200

SUPPLEMENTARY INFORMATION

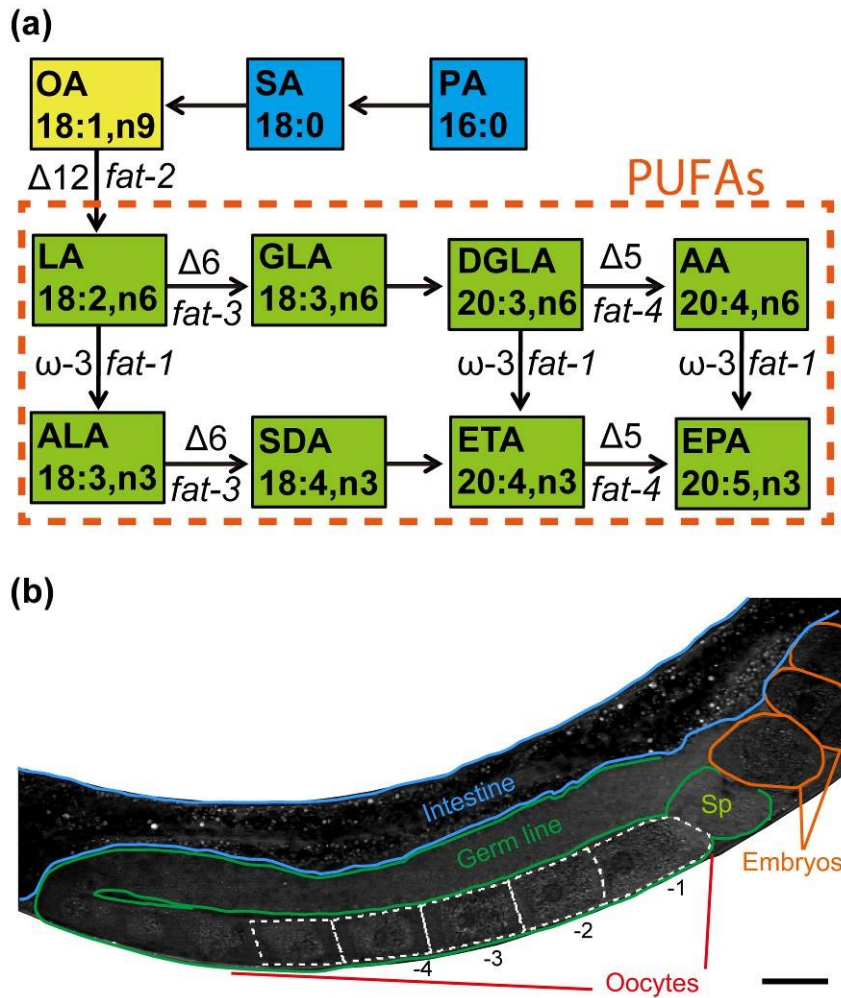

**Figure S1.** Lipid synthesis and distribution in *C. elegans*. **(a)** Lipid synthesis pathway in *C. elegans*. PA: palmitic acid; SA: stearic acid; OA: oleic acid; LA: linoleic acid; GLA: gamma-linolenic acid; DGLA: Dihomo-gamma-linolenic acid; AA: arachidonic acid; ALA: alpha-linolenic acid; SDA: stearidonic acid; ETA: eicosatetraenoic acid; EPA: eicosapentaenoic acid.  $\Delta 12$  for delta-12 desaturase (encoded with *fat-2* gene);  $\omega-3$  for omega-3 desaturase (encoded with *fat-1* gene);  $\Delta 6$  for delta-6 desaturase (encoded with *fat-3* gene);  $\Delta 5$  for delta-5 desaturase (encoded with *fat-4* gene). The *fat-1* gene encoding enzyme, omega-3 desaturase, can convert all omega-6 PUFAs into omega-3 PUFAs.<sup>1</sup> The *fat-2* gene encoding enzyme, delta-12 desaturase, plays a critical role in converting the monounsaturated fatty acid (MUFA) into various PUFAs.<sup>1</sup> The other two enzymes, delta-6 desaturase (encoded by *fat-3* gene) and delta-5 desaturase (encoded by *fat-4* gene), are involved in the biosynthesis of C20 PUFAs.<sup>1</sup> **(b)** The CARS image (at  $2845\text{ cm}^{-1}$ ) of a partial wild-type N2 worm shows the intestine and gonad. Sp stands for spermatheca. The dashed line highlights individual oocytes, and the numbers indicate the positions of each oocytes; the nearest one to Sp is designated as -1. Scale bar =  $30\ \mu\text{m}$ .

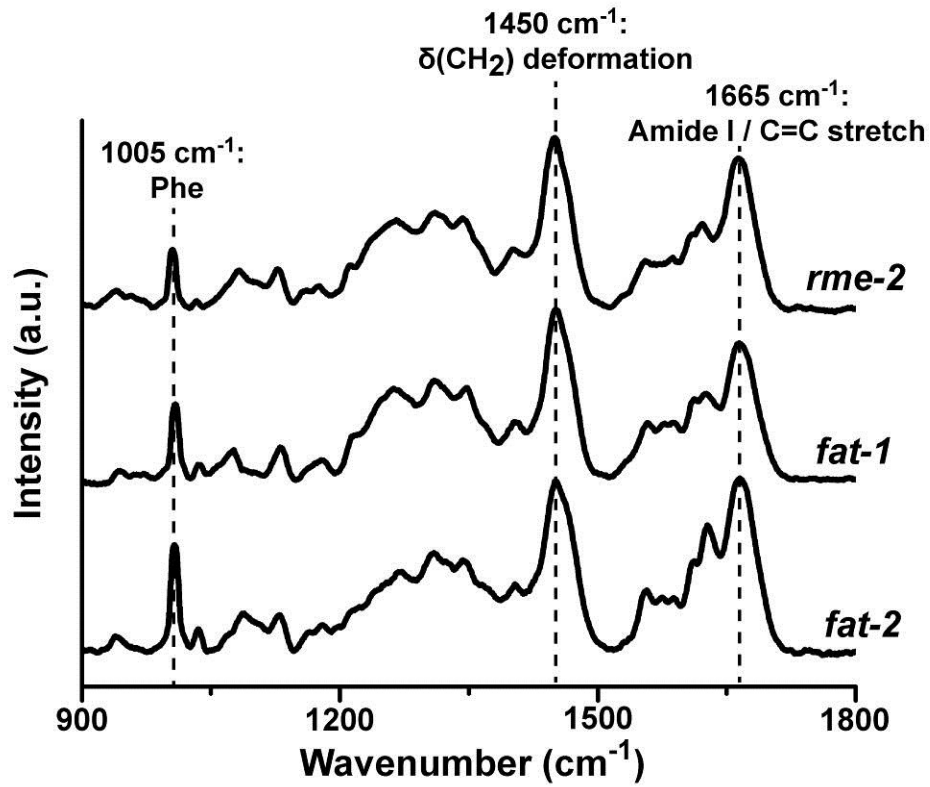

**Figure S2.** Raman spectra of yolk lipoprotein accumulation in *rme-2*, *fat-1*, and *fat-2* mutants. Raman peak assignment:  $1003 \text{ cm}^{-1}$  for phenylalanine (Phe),<sup>2</sup>  $1450 \text{ cm}^{-1}$  for  $\delta(\text{CH}_2)$  deformation vibration,<sup>3</sup> and  $1665 \text{ cm}^{-1}$  for amide I / C=C stretch.<sup>2</sup>

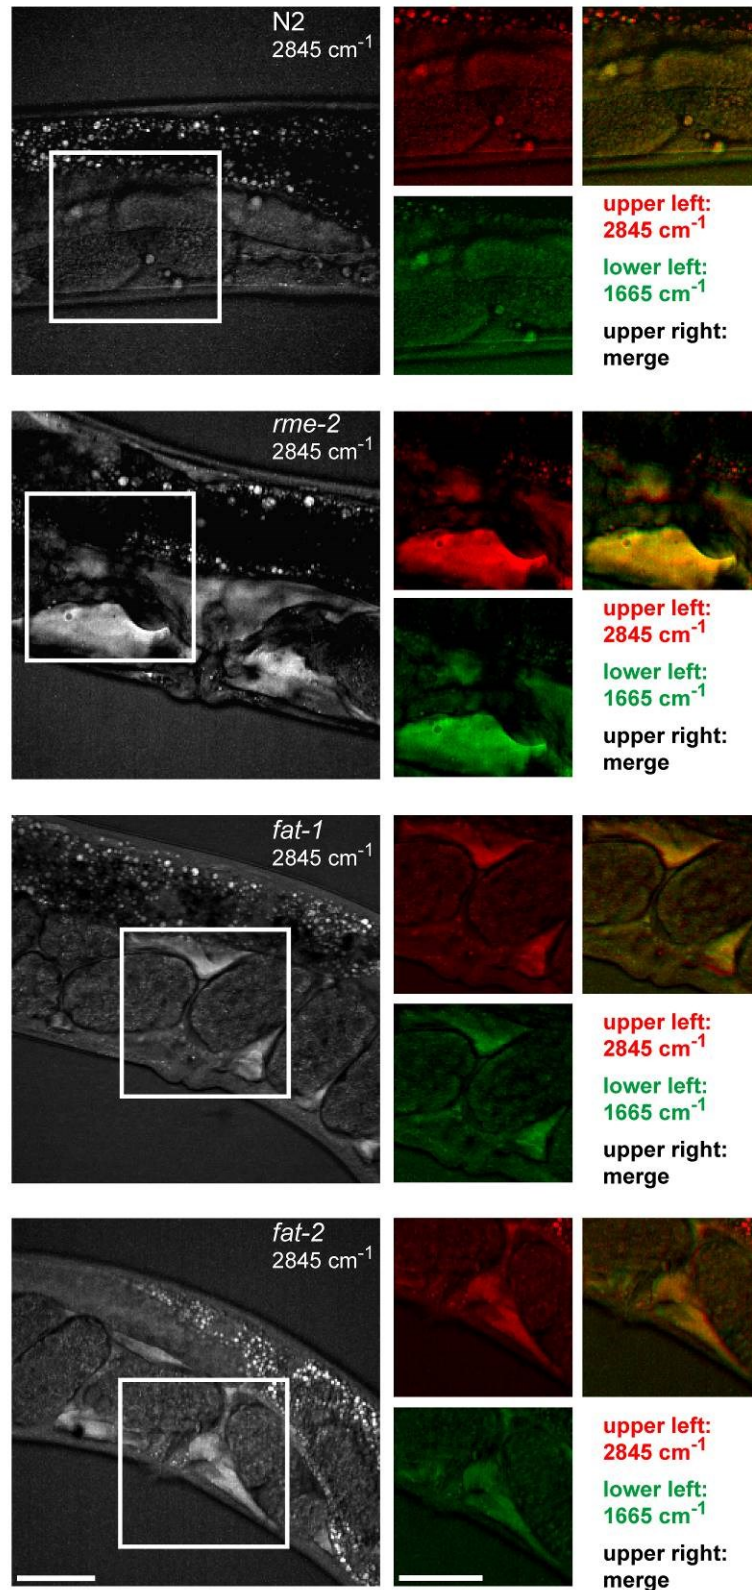

**Figure S3.** CARS imaging of *rme-2*, *fat-1*, and *fat-2* mutants at  $\sim 2845\text{ cm}^{-1}$  (lipid band, in red) and  $\sim 1665\text{ cm}^{-1}$  (protein band, in green). The merged images showed highly co-localization of yolk lipoprotein accumulation in CARS lipid and CARS protein images. Scale bar =  $30\text{ }\mu\text{m}$ .

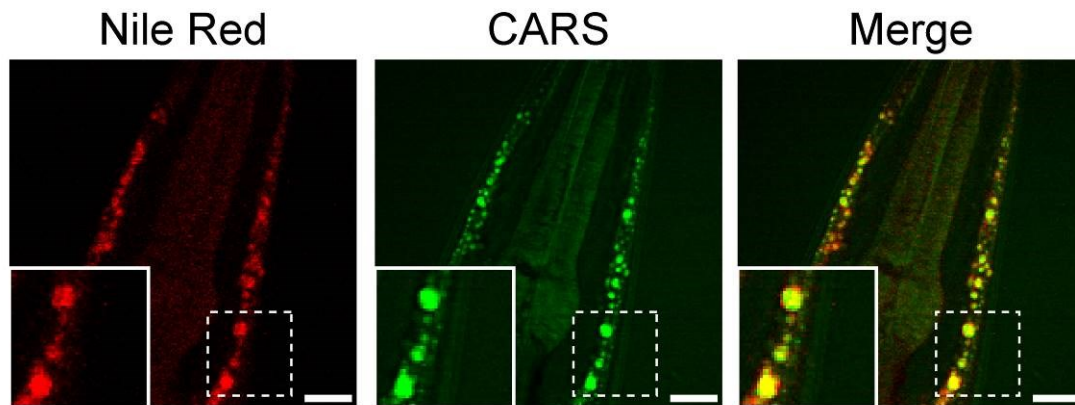

**Figure S4.** The comparison of Nile Red (red) and CARS (at 2845 cm<sup>-1</sup>, green) signals in detecting lipid droplets in the skin-like hypodermal cells of one-day adult (1D-Ad) wild-type worms. The fixed Nile Red staining protocol was adopted from the previous reported method.<sup>4</sup> Scale bar = 10  $\mu$ m.

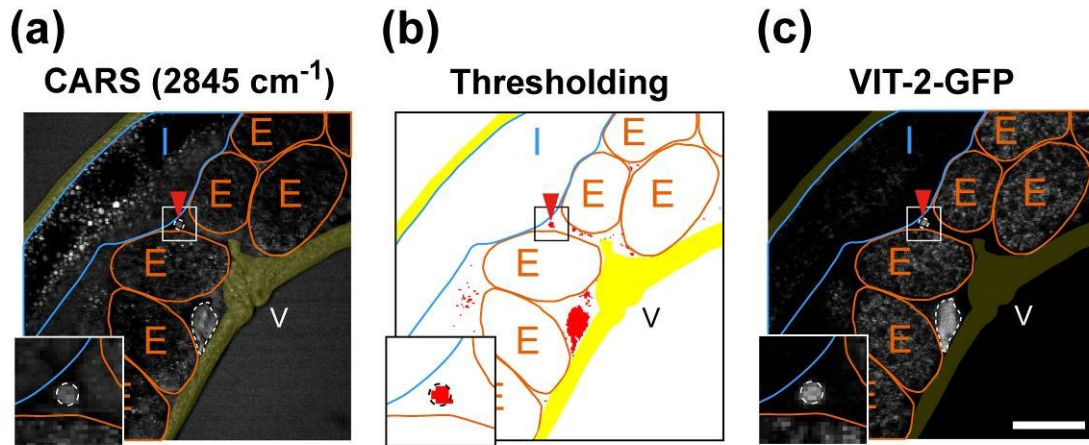

**Figure S5.** CARS and TPEF imaging of a 1D-Ad wild-type worm. **(a)** The CARS image, **(b)** the binary image (red and white) after applying the thresholding method, and **(c)** the VIT-2-GFP fluorescence image of the same worm. Red arrows indicate the same yolk lipoprotein accumulation, whose size is  $\sim 9.5\mu\text{m}^2$ . Scale bar = 30  $\mu\text{m}$ .

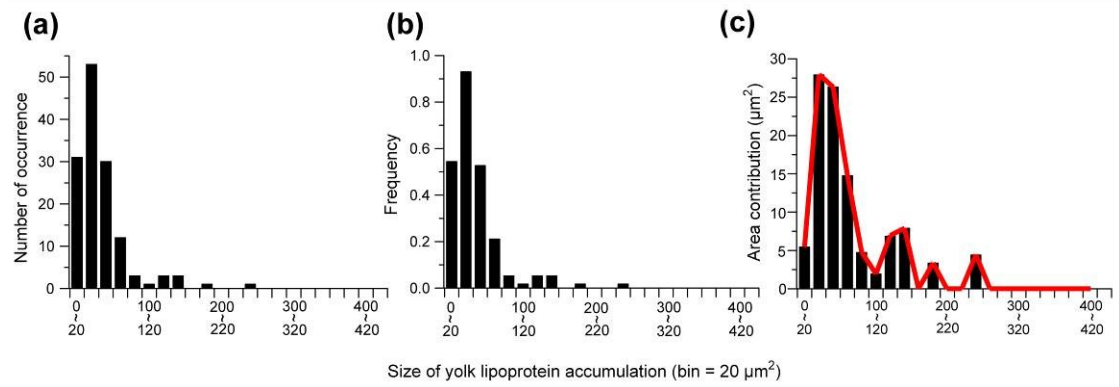

**Figure S6.** The analysis of yolk lipoprotein accumulation in the pseudocoelomic cavity of uterus in 1D-Ad wild-type worms (total 57 worms). **(a)** The size histogram of yolk lipoprotein accumulation. **(b)** The distribution of the average frequency to find a corresponding size of accumulation in a worm. **(c)** The area contribution histogram, obtained by multiplying the frequency by each binned area size. The red line stands for the area contribution curve.



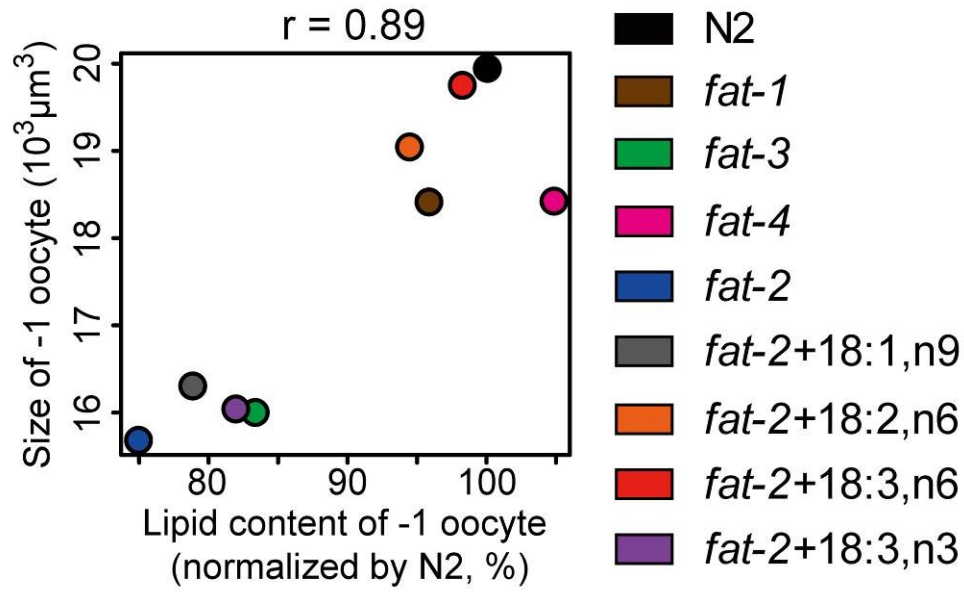

**Figure S7.** The correlation between lipid content and oocyte size together with the analyzed result of the Pearson's product-moment correlation coefficient ( $r=0.89$ ).



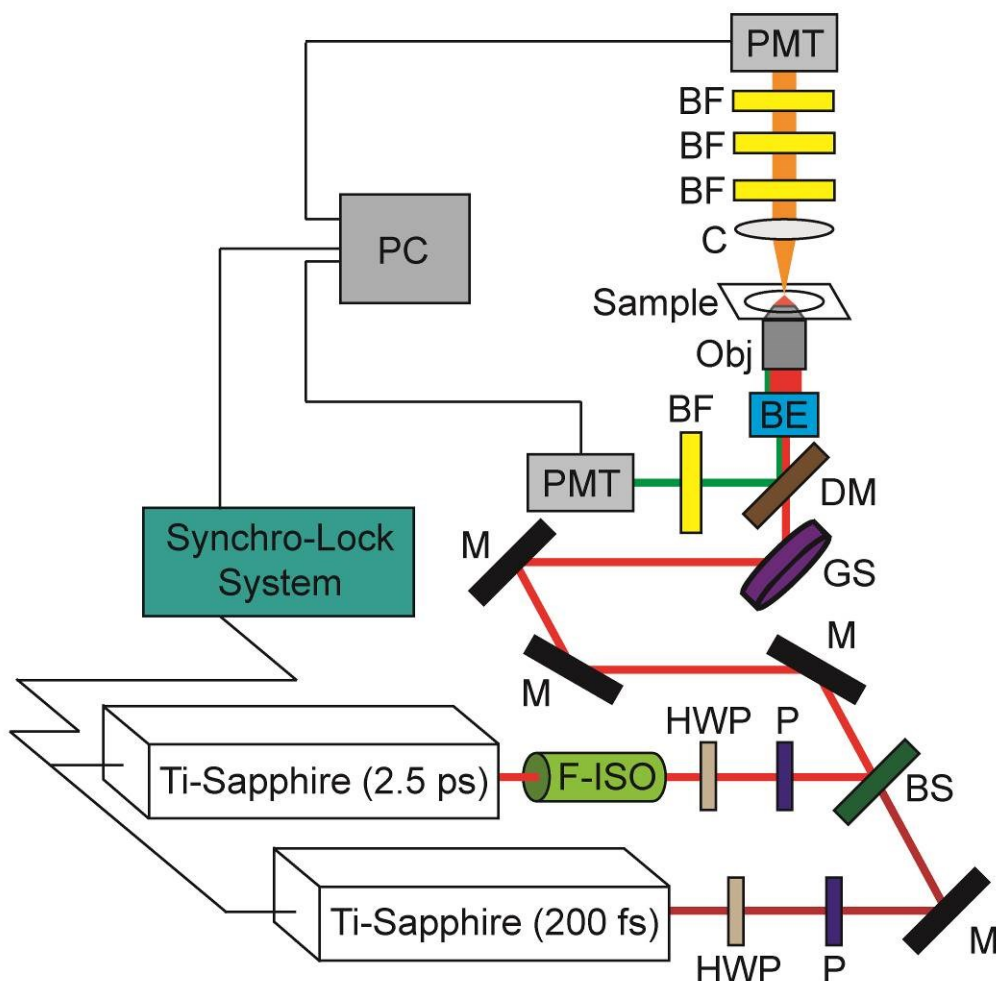

**Figure S8.** The setup of CARS microscopy. Briefly, two Ti-sapphire laser beams (Mira-900F as the Stokes beam and Mira-900P fixed at  $\sim 710\text{nm}$  as the pump/probe beam, Coherent, California) were synchronized by Synchro-Lock system (Coherent, California). The vibrational frequency difference between two laser beams was adjusted to match lipid band ( $\sim 2845\text{ cm}^{-1}$ ) or protein band ( $\sim 1665\text{ cm}^{-1}$ ) for CARS imaging. The two laser beams were collinearly combined and guide into a laser scanning microscope (FV300 and IX-71, Olympus, Tokyo, Japan), and focused onto the sample by a 40X N.A. = 0.9 objective (UPLSAPO 40X, Olympus, Tokyo, Japan). The forward CARS signal was collected by a condenser (N.A. = 0.55), passing through three band-pass filters (FF01-630/92\*2 and FF-01590/10\*1, Semrock, New York), and detected by a photomultiplier tube (PMT) (R7400U-02, Hamamatsu, Japan). Fluorescence signal of GFP was collected by the same 40X objective, passing through a band-pass filter (FF01-512/25, Semrock, Rochester, New York), and detected by a photomultiplier tube (PMT , R3896, Hamamatsu, Japan). F-ISO: Faraday isolator. BS: beam splitter. HWP: half-wave plate. P: polarizer. M: mirror. GS: galvo scanner. DM: dichroic mirror. BF: band-pass filter. C: condenser. BE: beam expander. Obj: objective. PMT: photomultiplier tube.

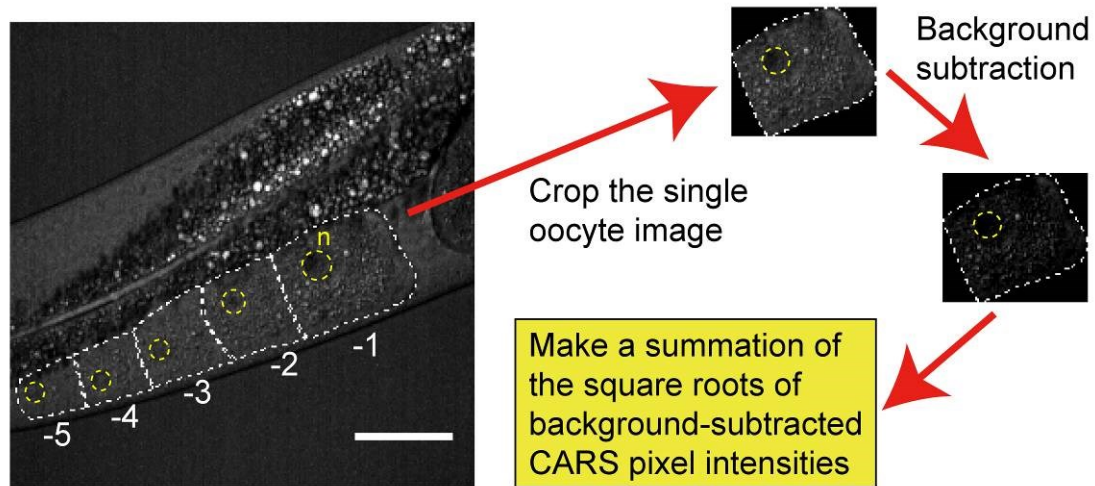

**Figure S9.** Steps of quantitative analysis of lipid storage in single oocytes. The single oocyte image was first cropped. Then, the background noise was determined by the average intensity of non-lipid-rich region, *e.g.* nucleus (indicated by yellow circle). Finally, the square root values of background-subtracted pixel intensities were integrated. For each worm, the first 5 oocytes (-1 to -5 oocytes) were quantitatively analyzed. Scale bar = 30  $\mu\text{m}$ .

## Reference

- 1 Watts, J. L. & Browse, J. Genetic dissection of polyunsaturated fatty acid synthesis in *Caenorhabditis elegans*. *P. Natl. Acad. Sci. U.S.A.* **99**, 5854-5859 (2002).
- 2 Camp, C. H. *et al.* High-speed coherent Raman fingerprint imaging of biological tissues. *Nat. Photonics* **8**, 627-634 (2014).
- 3 Le, T. T., Duren, H. M., Slipchenko, M. N., Hu, C. D. & Cheng, J. X. Label-free quantitative analysis of lipid metabolism in living *Caenorhabditis elegans*. *J. Lipid Res.* **51**, 672-677 (2010).
- 4 Yi, Y. H. *et al.* Lipid droplet pattern and nondroplet-like structure in two fat mutants of *Caenorhabditis elegans* revealed by coherent anti-Stokes Raman scattering microscopy. *J. Biomed. Opt.* **19**, 011011 (2014).
